# Supplementary material
Source: Research Square preprint supplement (doi:10.21203/rs.3.rs-10241609/v1)
Supplement: Supplementary file 1 [file 47a6ad9abc52da045b292fd5.docx]

| **Table 3. Exploratory logistic regression analyses of factors associated with hr-HPV positivity among female health workers** | | | | |
| --- | --- | --- | --- | --- |
| **Variable** | **hr-HPV infection** | | | |
| **Univariable models** | | **Adjusted model** | |
| **OR (95% CI)** | ***p*-value** | **aOR (95% CI)** | ***p*-value** |
| Age, years (continuous) | 0.98 (0.94−1.02) | 0.241 | - | - |
| Age group, years (categorical) |  |  |  |  |
| <30 (ref.) | 1.00 | - | 1.00 | - |
| 30−39 | 0.41 (0.22−0.75) | 0.004* | 0.32 (0.14−0.70) | 0.004* |
| ≥40 | 0.65 (0.29−1.49) | 0.313 | 0.37 (0.11−1.21) | 0.101 |
| Age at menarche, years (continuous) | 1.06 (0.93−1.21) | 0.415 | 1.11 (0.95−1.29) | 0.176 |
| Parity (discrete) | 0.90 (0.72−1.14) | 0.391 | 1.42 (1.02−1.97) | 0.038* |
| Parity (categorical) |  |  |  |  |
| 0 (ref.) | 1.00 | - | - | - |
| ≥1 | 0.76 (0.44−1.32) | 0.329 | - | - |
| Religious faith |  |  |  |  |
| Christian | 0.46 (0.08−2.83) | 0.403 | - | - |
| Islam/other (ref.) | 1.00 | - | - | - |
| Education level |  |  |  |  |
| Below tertiary | 0.63 (0.13−2.94) | 0.554 | - | - |
| Tertiary (ref.) | 1.00 | - | - | - |
| NHIS coverage | 1.19 (0.63−2.24) | 0.602 | - | - |
| Paid to screen (vs. free) | 1.01 (0.56−1.80) | 0.985 | - | - |
| Marital status |  |  |  |  |
| Married/cohabiting (ref.) | 1.00 | - | - | - |
| Single/steady partner/divorced/widowed | 1.52 (0.87−2.63) | 0.139 | - | - |
| Existing medical condition | 0.56 (0.24−1.32) | 0.183 | 0.46 (0.17−1.23) | 0.120 |
| Past gynecological surgery | 0.84 (0.42−1.71) | 0.636 | - | - |
| Prior cervical precancer screening | 0.58 (0.30−1.12) | 0.103 | - | - |
| Prior treatment after cervical screening | - | - | - | - |
| Current contraceptive use (any) | 1.00 (0.48−2.11) | 0.990 | 5.86 (1.33−25.72) | 0.019* |
| Condom | 1.29 (0.24−6.79) | 0.767 | 0.10 (0.01−1.20) | 0.069 |
| Combined (estrogen-containing) pill | 3.23 (0.20−52.31) | 0.410 | - | - |
| Other (non-estrogen-containing) | 0.44 (0.15−1.31) | 0.139 | 0.05 (0.01−0.41) | 0.005* |
| Past contraceptive use (any) | 0.73 (0.42−1.29) | 0.277 | - | - |
| Condom | 1.24 (0.60−2.57) | 0.562 | 1.94 (0.80−4.66) | 0.140 |
| Combined (estrogen-containing) pill | 2.10 (0.83−5.30) | 0.118 | 2.27 (0.78−6.58) | 0.131 |
| Other (non-estrogen-containing) | 0.25 (0.10−0.60) | 0.002* | 0.18 (0.06−0.51) | 0.001* |
| Visual inspection TZ |  |  |  |  |
| Type 1 | 0.78 (0.36−1.71) | 0.540 | - | - |
| Type 2 | 0.79 (0.39−1.57) | 0.493 | 0.52 (0.24−1.13) | 0.100 |
| Type 3 (ref.) | 1.00 | - | 1.00 | - |
| Visual inspection (EVA/VIA) positive | 2.84 (1.20−6.73) | 0.042* | 2.89 (1.11−6.82) | 0.036* |
| VIA positive | 3.26 (0.45−23.61) | 0.242 | 4.97 (0.41−60.99) | 0.210 |
| EVA positive | 2.33 (0.99−5.46) | 0.052 | 2.23 (0.82−6.08) | 0.118 |
| VIA, visual inspection with acetic acid; TZ, transformation zone; EVA, Enhanced Visual Assessment; CI, confidence interval; OR, odds ratio; hr-HPV, high-risk human papillomavirus; ref., reference category  *Statistically significant | | | | |
