# Supplementary material
Source: Research Square preprint supplement (doi:10.21203/rs.3.rs-10241609/v1)
Supplement: Supplementary file 2 [file a3cd58cd1575a7b4b6d0c405.docx]

**Additional File**

Additional file 1: CCPTC Screening Questionnaire.pdf
